# Supplementary material for: One-Pot Synthesis of Rubber Seed Shell-Derived N-Doped Ultramicroporous Carbons for Efficient CO2 Adsorption
Source: MDPI journal article supplement (doi:10.3390/nano12111889), 2022-05-31
Supplement: s1 [file s1]

# One-pot synthesis of rubber seed shell-based N-doped ultramicroporous carbons for efficient CO<sub>2</sub> adsorption

Xiaoxia Zhang <sup>1</sup>, Meng Rong <sup>2</sup>, Hui Cao <sup>1,\*</sup> and Tianwei Tan <sup>1,\*</sup>

<sup>1</sup> Beijing Key Laboratory of Bioprocess, College of Life Science and Technology, Beijing University of Chemical Technology, Beijing 10029, China; zhangxiaoxia0416@163.com

<sup>2</sup> CAS Key Laboratory of Green Process and Engineering, Institute of Process Engineering, Chinese Academy of Sciences, Beijing 100190, China; mrong@ipe.ac.cn

\* Correspondence: caohui@mail.buct.edu.cn (H.C.); twtan@mail.buct.edu.cn (T.T.)

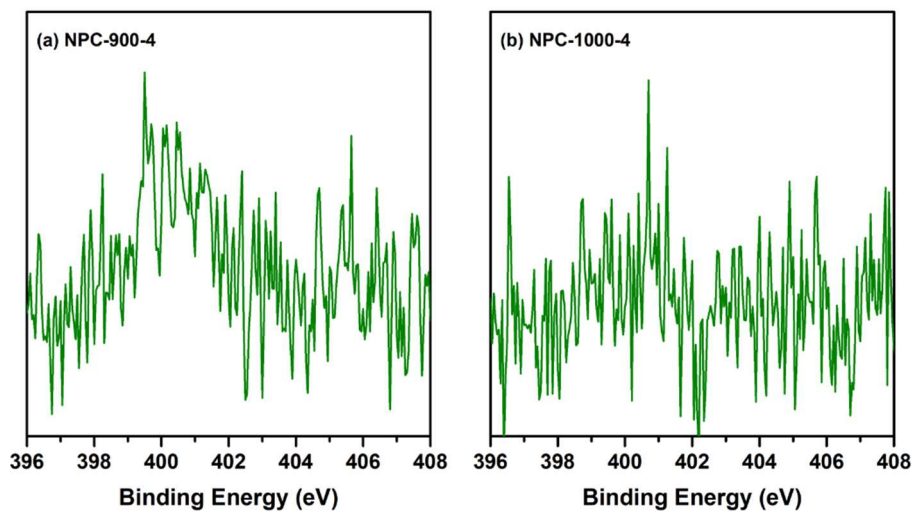

Figure S1. N1s XPS spectra of NPC-900-4 (a) and NPC-1000-4 (b)

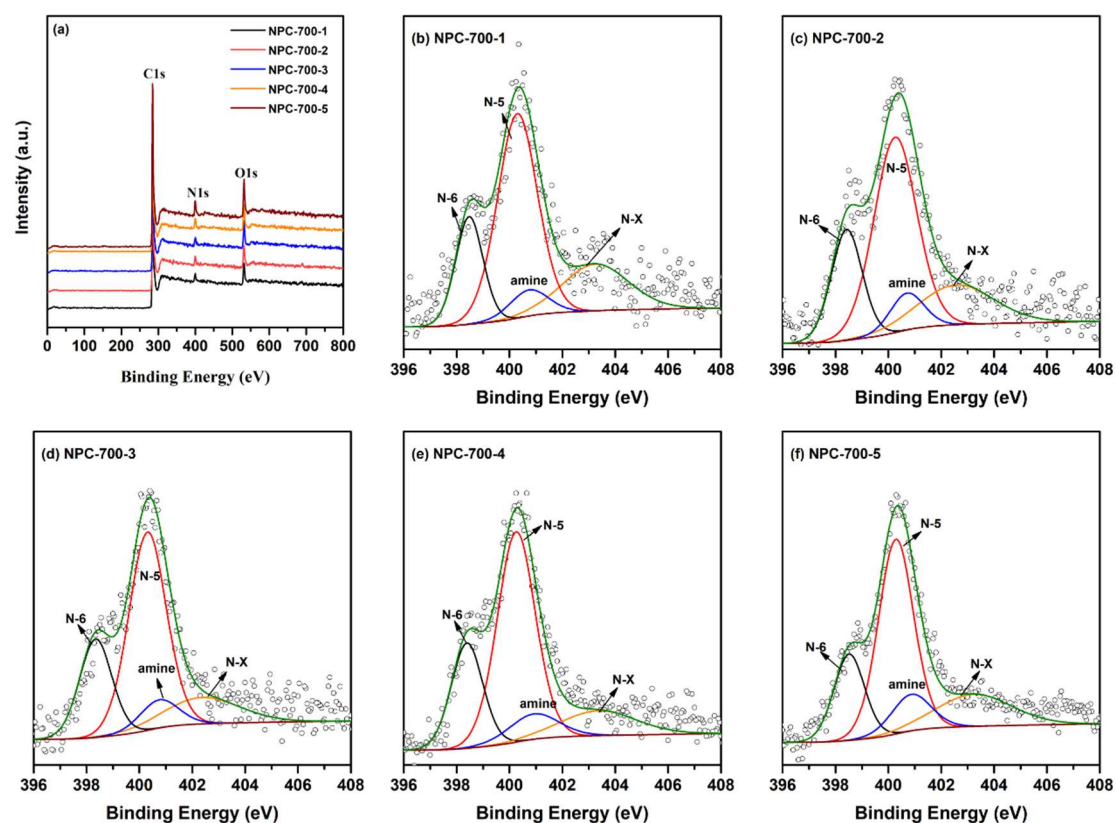

**Figure S2.** XPS (a) and N1s XPS (b-f) spectra of NPC-700-x.

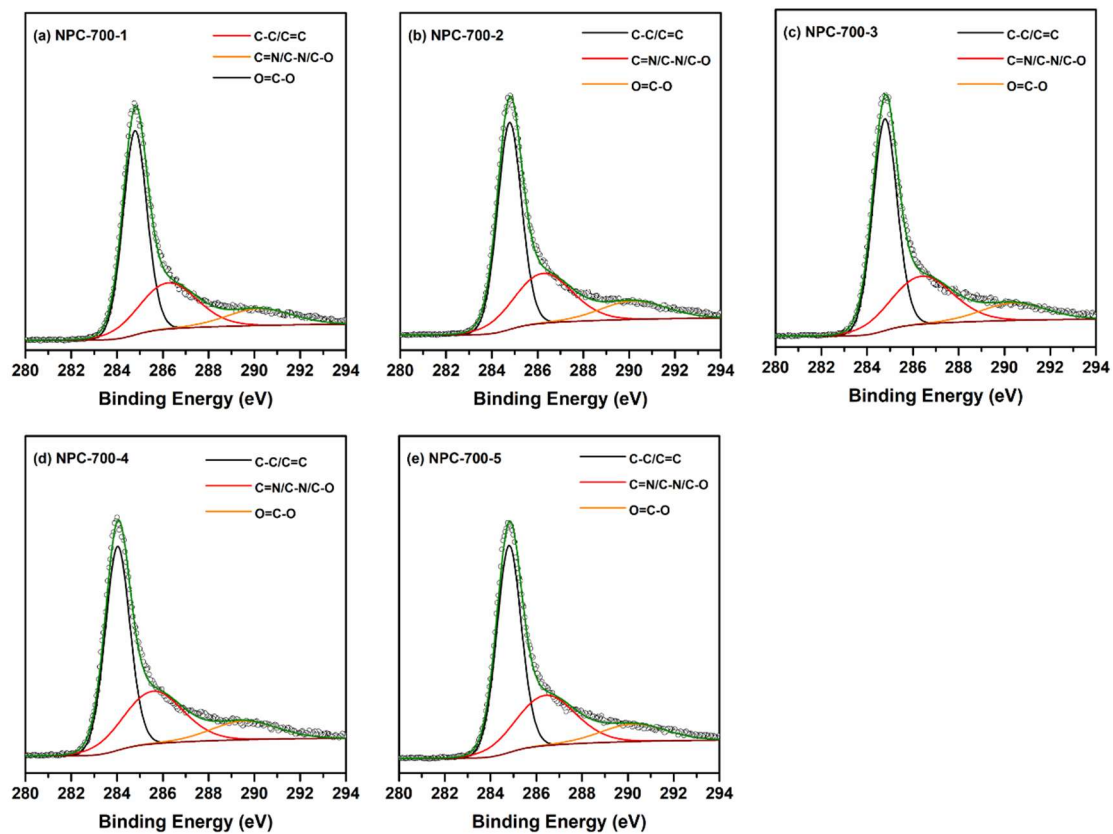

**Figure S3.** C1s XPS spectra of NPC-700-x (a-e).

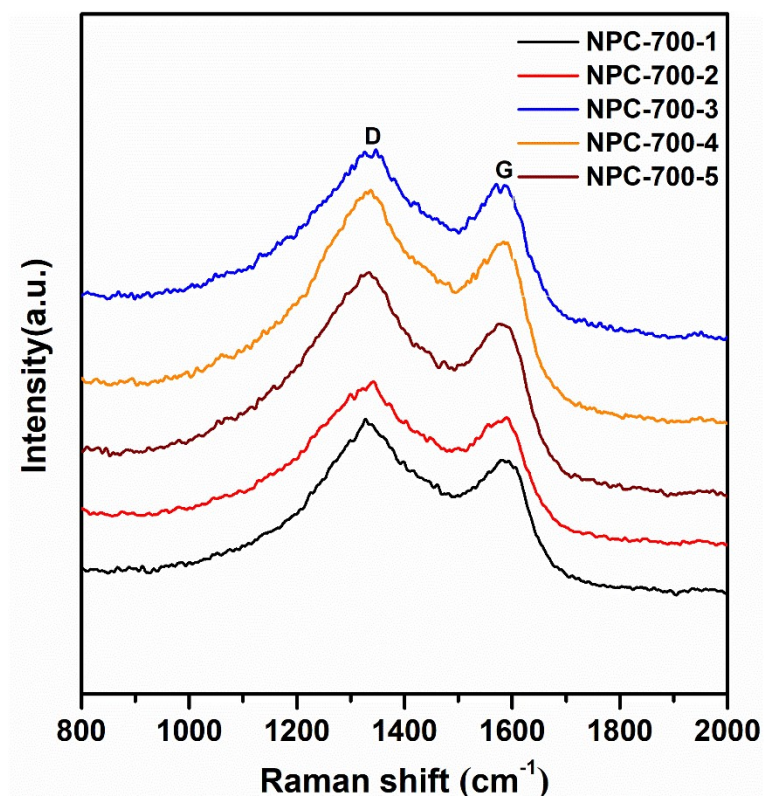

Figure S4. Raman spectra of NPC-700- $x$ .

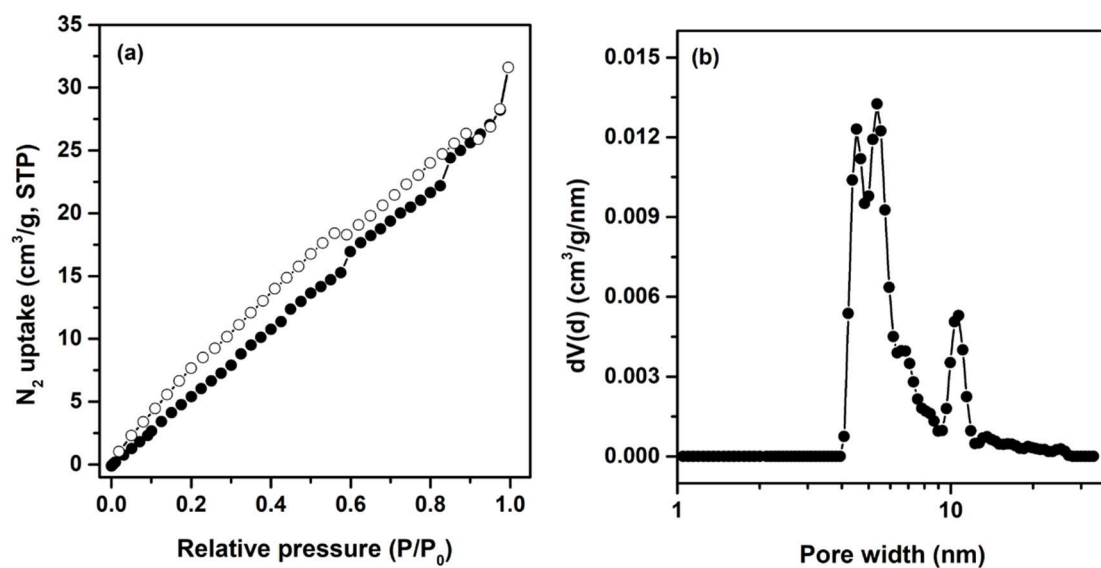

Figure S5. 77 K  $\text{N}_2$  adsorption-desorption isotherms (a) and pore size distribution (b) of RSS.

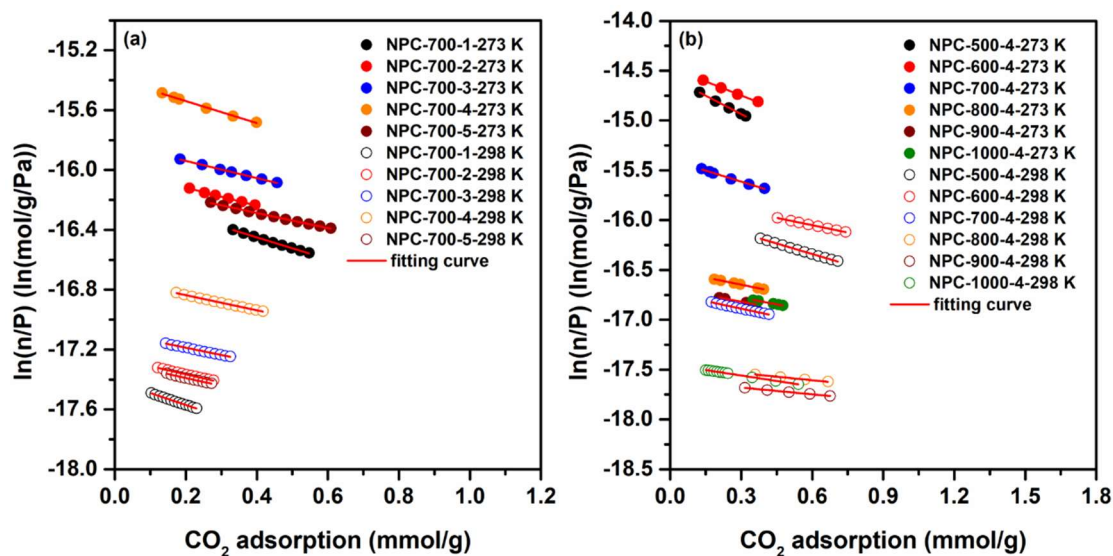

Figure S6. Virial plots of NPC-700-x (a) and NPC-y-4 (b) .

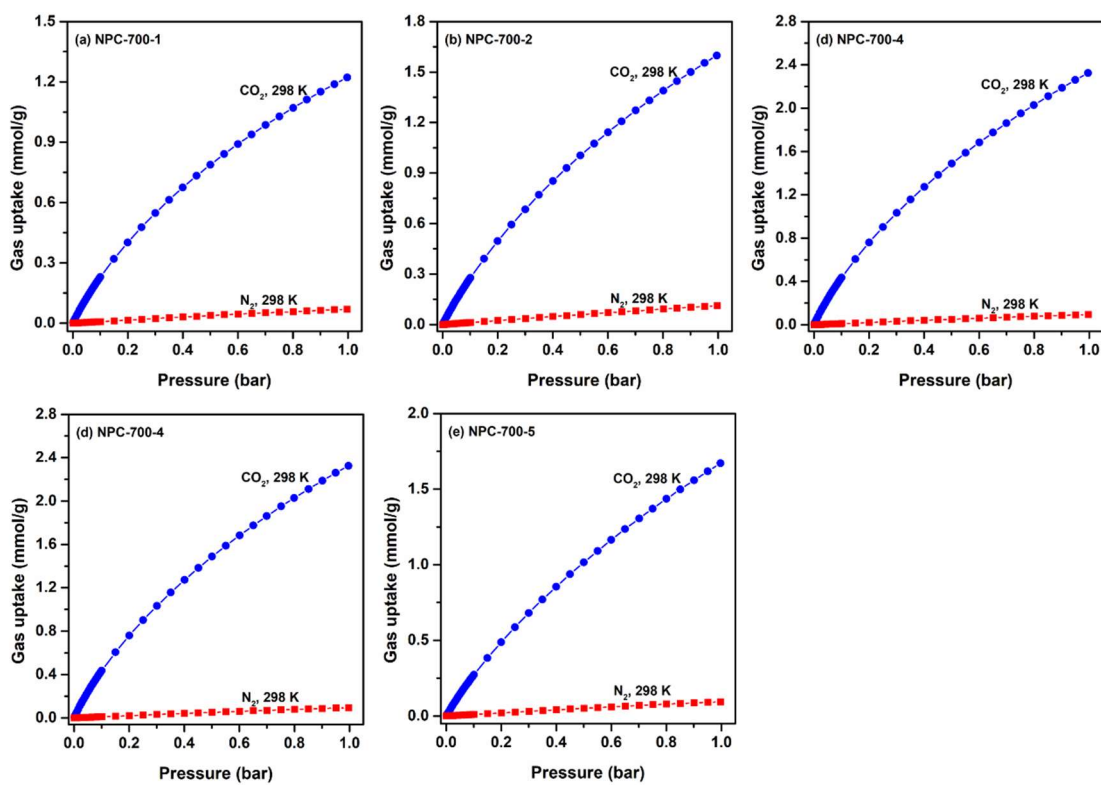

Figure S7.  $\text{CO}_2$  and  $\text{N}_2$  adsorption isotherms of NPC-700-x and NPC-y-4 at 298 K (a-e) .

Table S1  $I_D/I_G$  values of NPC-y-4.

|       | NPC-500-4 | NPC-600-4 | NPC-700-4 | NPC-800-4 | NPC-900-4 | NPC-1000-4 |
|-------|-----------|-----------|-----------|-----------|-----------|------------|
| ID/IG | 1.23      | 1.16      | 1.12      | 1.11      | 1.09      | 0.97       |

**Table S2.**  $K_H$ ,  $A_0$ , and  $Q_0$  values of CO<sub>2</sub> adsorption in the NPC-700- $x$  and NPC- $y$ -4.

| Sample    | $T/K$ | $K_H/\text{mol}/(\text{g}.\text{Pa})$ | $A_0/\ln(\text{mol}/(\text{g}.\text{Pa}))$ | $R^2$ | $Q_0$ |
|-----------|-------|---------------------------------------|--------------------------------------------|-------|-------|
| NPC-700-1 | 273   | -16.159                               | 9.60123E-08                                | 0.999 | 33.9  |
|           | 298   | -17.411                               | 2.74511E-08                                | 0.998 |       |
| NPC-700-2 | 273   | -15.996                               | 1.12978E-07                                | 0.998 | 34.1  |
|           | 298   | -17.257                               | 3.20317E-08                                | 0.999 |       |
| NPC-700-3 | 273   | -15.824                               | 1.34215E-07                                | 0.999 | 34.3  |
|           | 298   | -17.090                               | 3.78381E-08                                | 0.999 |       |
| NPC-700-4 | 273   | -15.392                               | 2.06642E-07                                | 0.998 | 36.4  |
|           | 298   | -16.735                               | 5.39575E-08                                | 0.999 |       |
| NPC-700-5 | 273   | -16.021                               | 1.10197E-07                                | 0.999 | 34.2  |
|           | 298   | -17.285                               | 3.11276E-08                                | 0.998 |       |
| NPC-500-4 | 273   | -14.567                               | 4.71767E-07                                | 0.999 | 36.6  |
|           | 298   | -15.916                               | 1.22344E-07                                | 0.999 |       |
| NPC-600-4 | 273   | -14.460                               | 5.25056E-07                                | 0.998 | 37.4  |
|           | 298   | -15.840                               | 1.32061E-07                                | 0.999 |       |
| NPC-800-4 | 273   | -16.500                               | 6.82335E-08                                | 0.999 | 26.1  |
|           | 298   | -17.464                               | 2.60325E-08                                | 0.999 |       |
| NPC-900-4 | 273   | -16.688                               | 5.65472E-08                                | 1.000 | 25.0  |
|           | 298   | -17.611                               | 2.24622E-08                                | 0.998 |       |
| NPC-100-4 | 273   | -16.646                               | 5.90017E-08                                | 0.999 | 21.8  |
|           | 298   | -17.449                               | 2.64243E-08                                | 0.999 |       |
